# Supplementary material for: Structure of SpoT reveals evolutionary tuning of catalysis via conformational constraint
Source: PubMed Central journal article supplement (PMC9974481; doi:10.1038/s41589-022-01198-x), 2022-12-05
Supplement: 41589_2022_1198_MOESM1_ESM.pdf [file 41589_2022_1198_MOESM1_ESM.pdf]

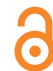

# Structure of SpoT reveals evolutionary tuning of catalysis via conformational constraint

In the format provided by the authors and unedited

1 SUPPLEMENTARY FIGURES

2

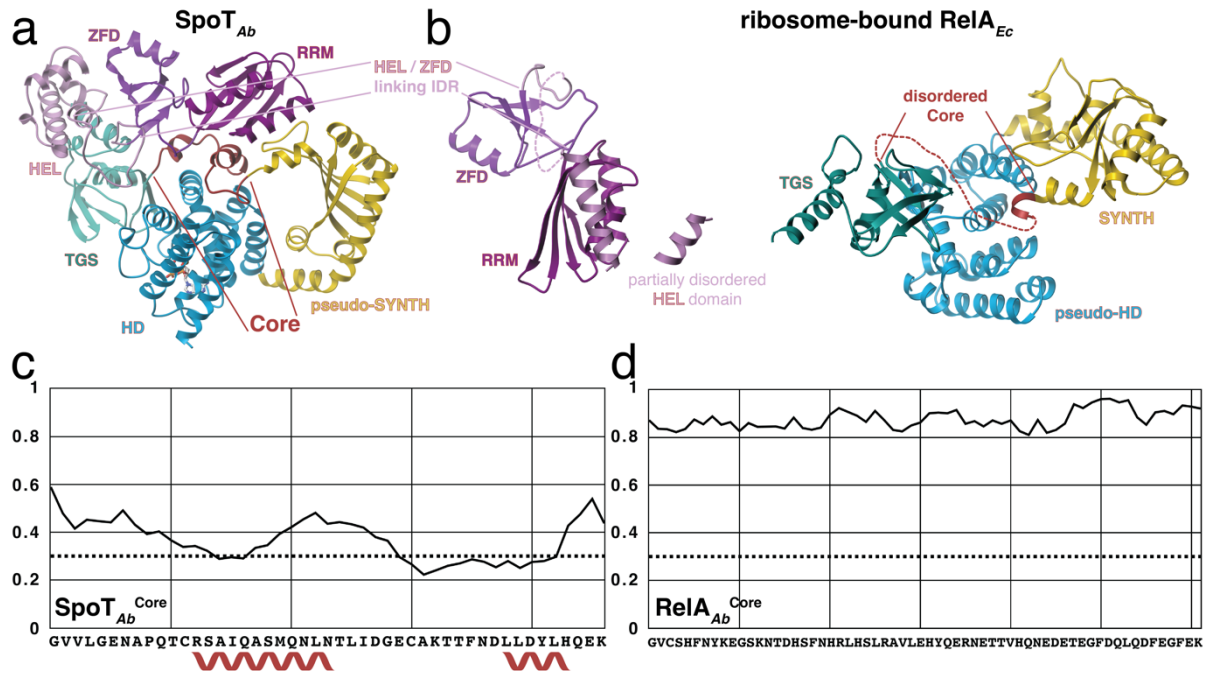

3

4

5 **Supplementary Fig. 1. The linker regions connecting  $\alpha$ -helices  $\alpha$ 6 and  $\alpha$ 7, SYNTH**  
 6 **(pseudo-SYNTH) with TGS, and HEL with ZFD appear as highly flexible regions in the**  
 7 **structures of free SpoT<sub>Ab</sub> as well as *E. coli* RelA bound starved ribosomal complex, related**  
 8 **to Fig. 2. Cartoon representation of the structures of SpoT<sub>Ab</sub> (a) and *E. coli* RelA (Brown et al.,**  
 9 **2016) in the conformation bound to 70S ribosomes and uncharged A-site tRNA (b). The**  
 10 **intrinsically disordered linker regions that are not visible in the structures are highlighted in the**  
 11 **figures and the individual domains are coloured as on Analysis of the intrinsic disorder**  
 12 **propensity of the Core domain of SpoT<sub>Ab</sub> (c) vs RelA<sub>Ab</sub> (d) calculated with fIDPnn. The two  $\alpha$ -**  
 13 **helices observed in the Core of SpoT<sub>Ab</sub> match the two stretches predicted by fIDPnn with low**  
 14 **disordered content. The comparison of both Core regions suggests RelA<sub>Ab</sub> Core is significantly**  
 15 **more disordered than that of SpoT<sub>Ab</sub>.**

16

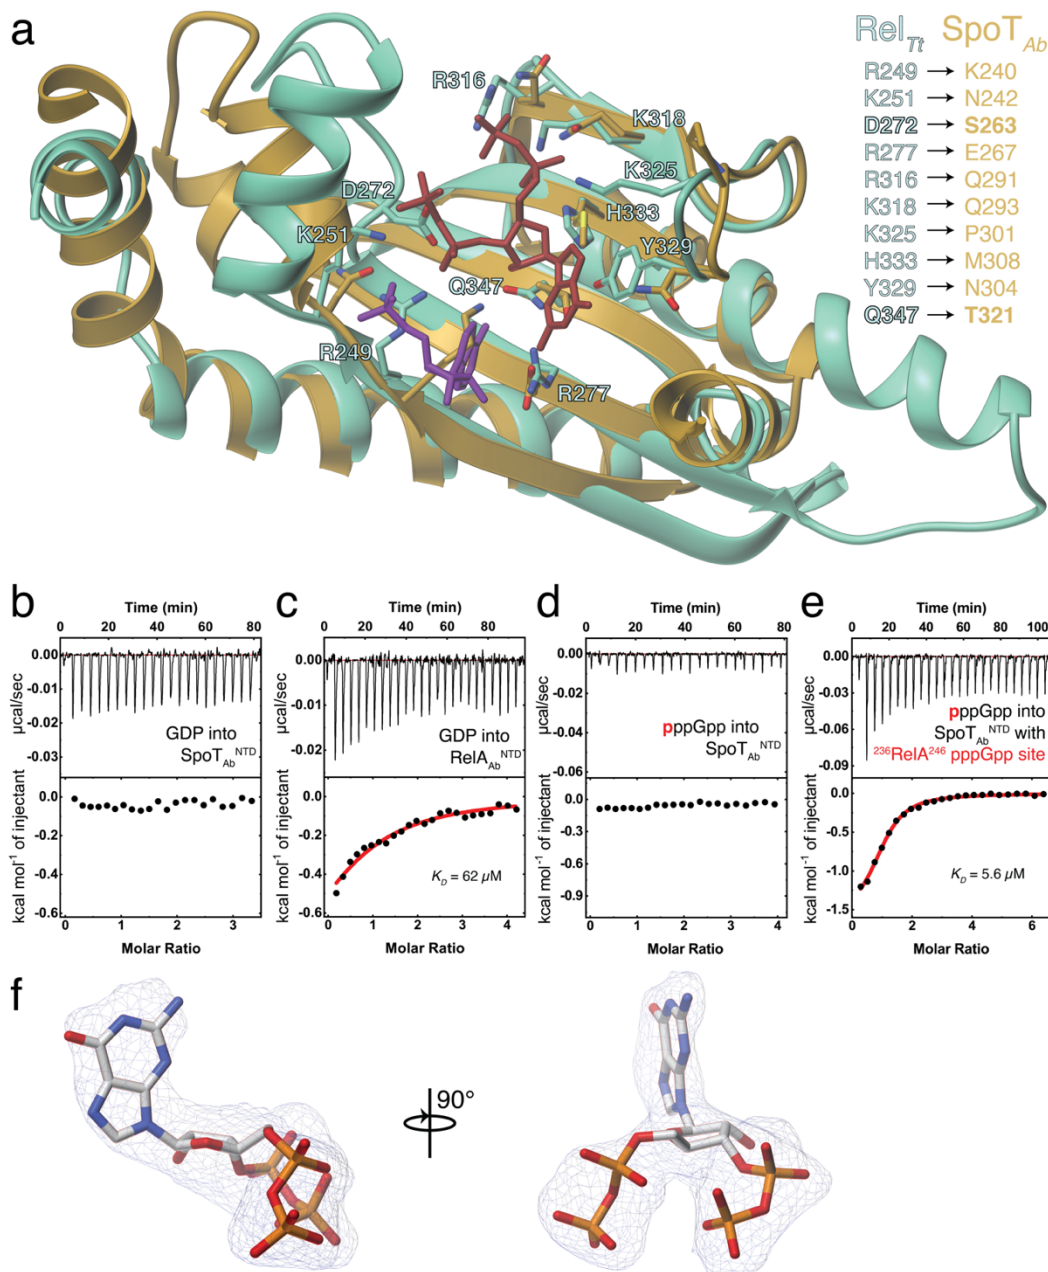

17  
18  
19  
20  
21  
22  
23  
24  
25  
26  
27  
28  
29  
30  
31  
32

**Supplementary Fig. 2. SpoT<sub>Ab</sub> is a monofunctional (p)ppGpp hydrolase with a degenerated pseudo-SYNTH domain, related to Fig. 2.**

(a) Superposition of the pseudo-SYNTH domain of SpoT<sub>Ab</sub> (in gold) onto the SYNTH domain of *T. thermophilus* Rel (Rel<sub>Ti</sub>) bound to ppGpp and AMP (in green). While the overall topology of the domain is conserved, a large number of substitutions in the nucleotide binding sites precludes substrate binding and catalysis of the pyrophosphate transfer. The crucial conserved Y that stacks with the guanine base of GDP and GTP is substituted to N, while the R residues that stacks with adenine (R249 and R277 in Rel<sub>Ti</sub>) changed to K and E, respectively. Finally, catalytic residues D, E and Q residues involved Mg<sup>2+</sup> coordination and hydrolysis changed to S263, 2319 and T321, respectively. ITC titrations of GDP into either SpoT<sub>Ab</sub><sup>NTD</sup> (b) or RelA<sub>Ab</sub><sup>NTD</sup> (c). ITC titration of pppGpp into SpoT<sub>Ab</sub><sup>NTD</sup> (d) and SpoT<sub>Ab</sub><sup>NTD</sup> with a grafted pppGpp-binding site of RelA<sub>Ab</sub>, <sup>236</sup>RelA<sup>246</sup> (e). In both cases the enzymes are supplemented with 1 mM APCPP, 1 mM GDP, and 10 mM EDTA. (f) Unbiased mFo-DFc electron density map of ppGpp bound to SpoT<sub>Ab</sub>, after refinement with Buster/TNT and omitting ppGpp.

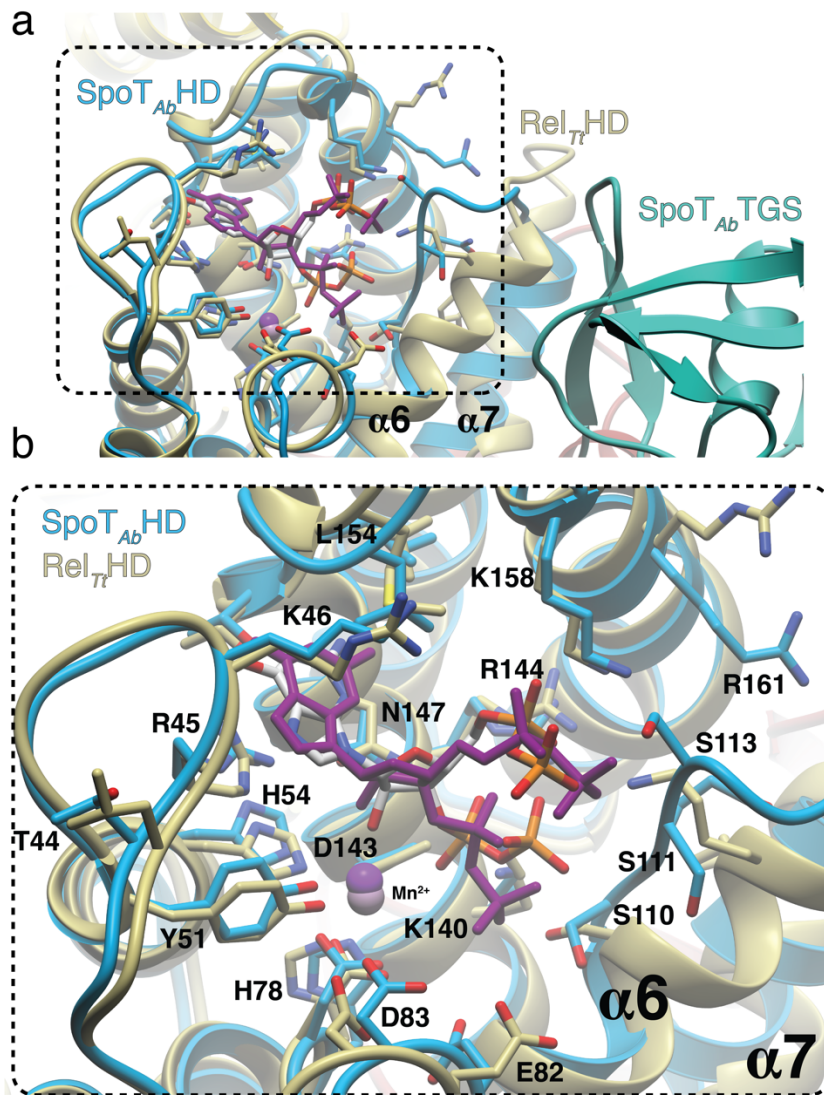

33  
 34  
 35  
 36  
 37  
 38  
 39  
 40  
 41  
 42  
 43

**Supplementary Fig. 3. Conservation of the hydrolase active site architecture of SpoT<sub>Ab</sub> compared to Rel<sub>Tt</sub>, related to Fig. 3.** (a) Superposition of the HD domain of SpoT<sub>Ab</sub> bound to ppGpp (coloured as in Figure 1a) onto the HD domain of *T. thermophilus* Rel (Rel<sub>Tt</sub>) bound to ppGpp (in yellow). From the superposition it becomes clear how the TGS domain of SpoT<sub>Ab</sub> keeps the shorter  $\alpha6\alpha7$  loop locked into place. (b) Details of the strong conservation of the active site residues interacting with ppGpp. The only the region highly divergent between Rel<sub>Tt</sub> and SpoT<sub>Ab</sub> is  $\alpha6\alpha7$  loop which in Rel<sub>Tt</sub> is part of the allosteric network that control the bifunctional activities of the enzyme, which is lost in SpoT<sub>Ab</sub>.

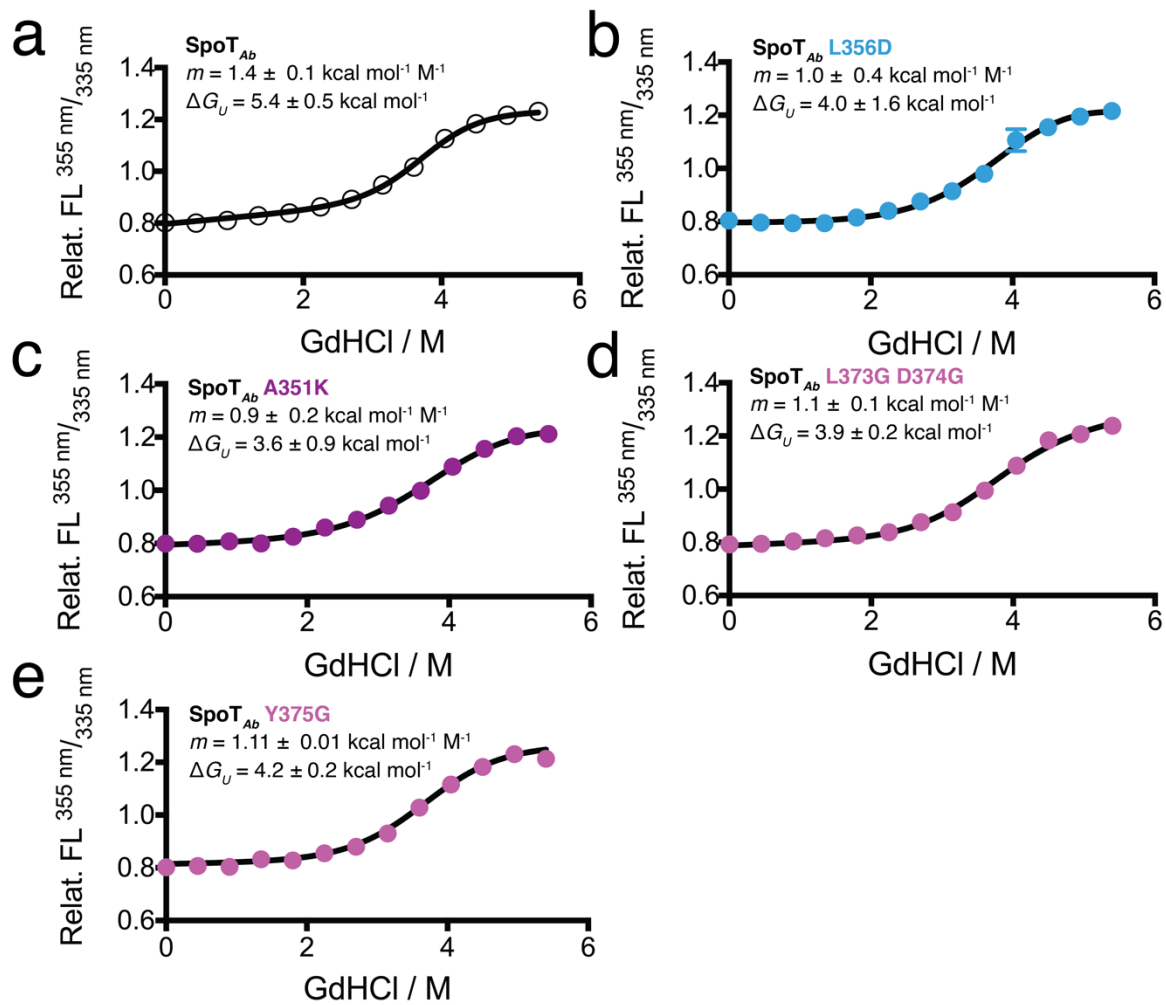

44  
 45  
 46  
 47  
 48  
 49  
 50

**Supplementary Fig. 4. Effects of amino acid substitutions on the structural stability of SpoT<sub>Ab</sub>, related to Fig. 4.** Thermal denaturation profiles monitored by far UV CD spectrum at 222 nm probing the  $\alpha$ -helical content of wild-type SpoT<sub>Ab</sub> (a) as well as substituted variants (b-e).

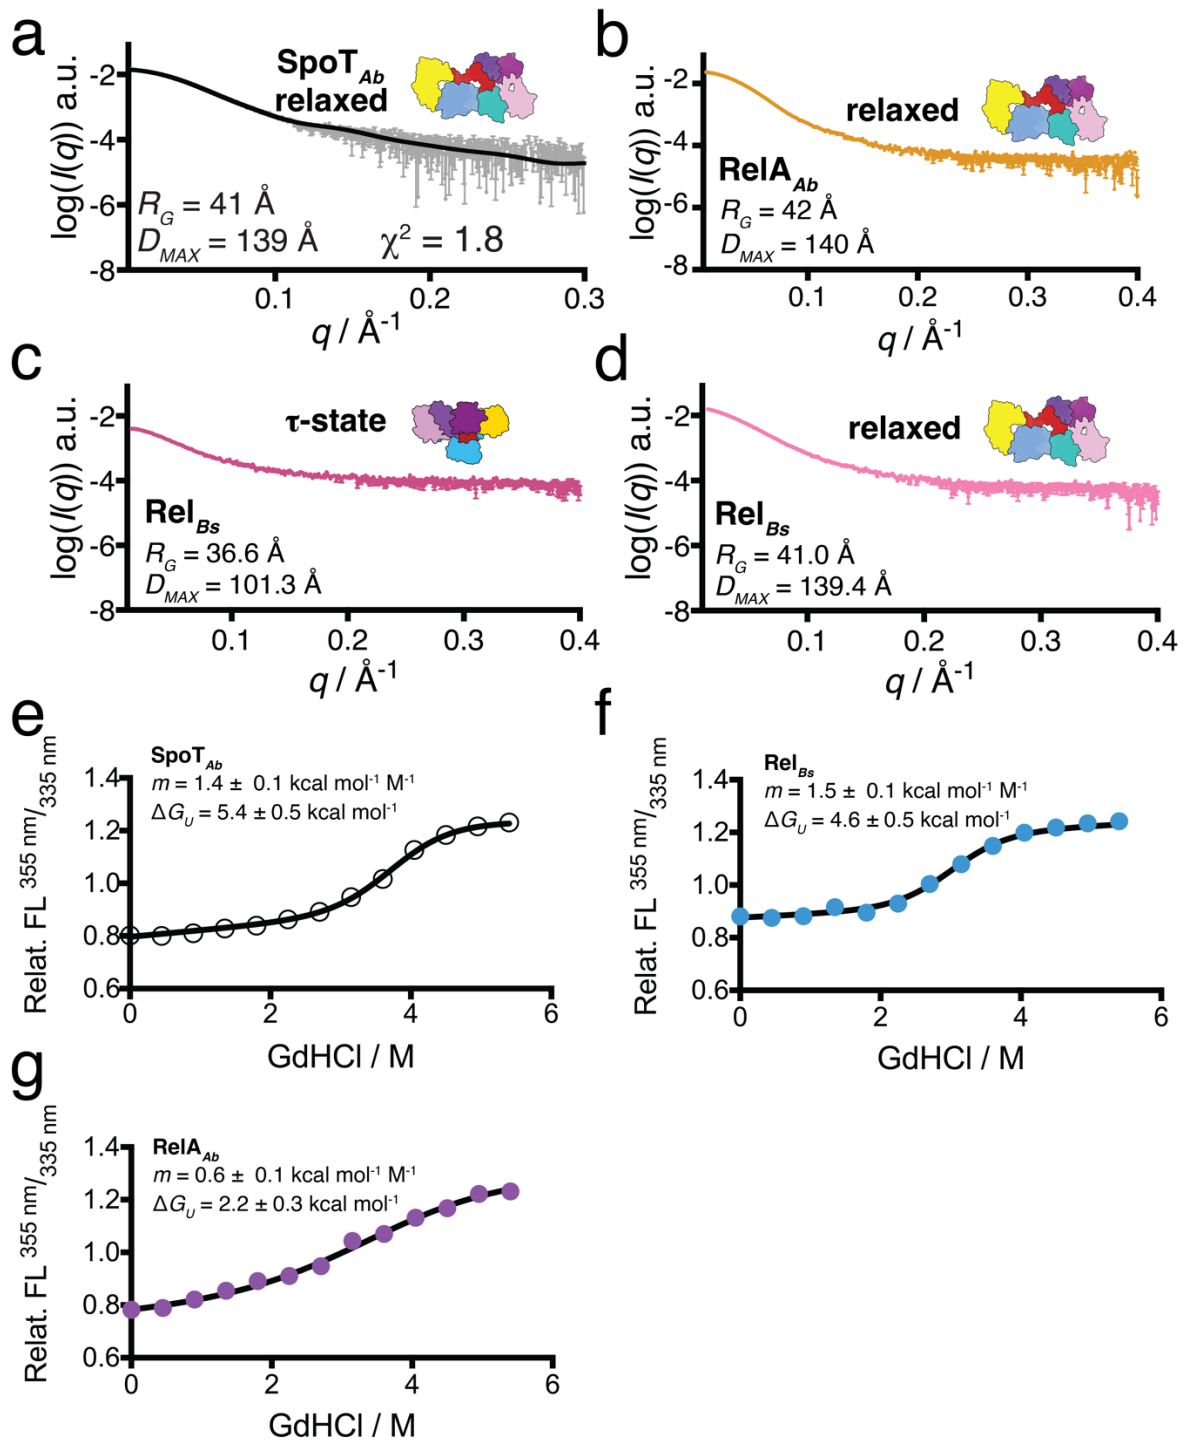

51  
52  
53  
54  
55  
56  
57  
58  
59  
60  
61  
62

**Supplementary Fig. 5. Effects of amino acid substitutions on the conformational state and structural stability of RSH enzymes (related to Fig. 4).** (a) Comparison of the experimental SAXS data from the relaxed state of L356D (in grey) with the theoretical scattering curve of the relaxed state (solid line) obtained from the Dadimodo model. (b) SAXS curve of RelA<sub>Ab</sub> is consistent with the dimensions of the relaxed state. SAXS curves of Rel<sub>Bs</sub> in the  $\tau$ -state (c) or relaxed state (d). Thermal denaturation profiles monitored by far UV CD spectrum at 222 nm of wild-type SpoT<sub>Ab</sub> (e) as a reference for a long RSH enzyme in a full  $\tau$ -state, Rel<sub>Bs</sub> which contains both the  $\tau$ - and relaxed state with the equilibrium predominately shifted to the  $\tau$ -state (f), and RelA<sub>Ab</sub> which is fully in a relaxed state (g).

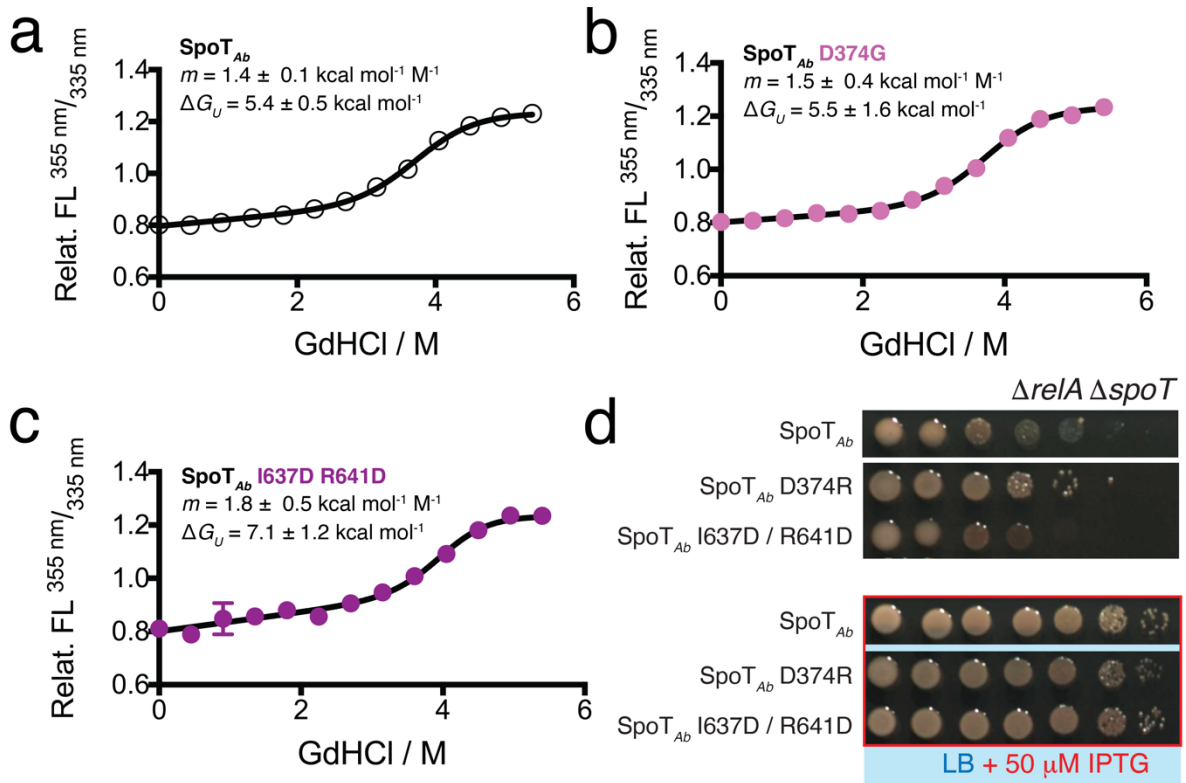

64

65

66

67

68

69

70

71

72

73

**Supplementary Fig. 6. Effects of amino acid substitutions on the structural stability and *in vivo* activity of SpoT<sub>Ab</sub> (related to Fig. 5).** Thermal denaturation profiles monitored by far UV CD spectrum at 222 nm probing the  $\alpha$ -helical content of wild-type SpoT<sub>Ab</sub> (a) as well as substituted variants (b and c). (d) *In vivo* HD functionality tests of SpoT<sub>Ab</sub><sup>D374G</sup> and SpoT<sub>Ab</sub><sup>I637D/R641D</sup> expressed from the inducible *Ptac* promoter in a  $\Delta relA \Delta spoT$  background of *A. baumannii* (AB5075) expressing *relA* from a replicative plasmid (pPreLA::*relA*). The stabilising substitutions D374R and I637D/R641D phenocopy the WT.

74 **SUPPLEMENTARY TABLES**

75

76 **Supplementary Table 1. X-ray data collection and processing.**77 The  $CC_{1/2}$  criterion was used to determine the resolution range. Values for the outer shell are  
78 given in parentheses.

79

| <b>Sample</b>                                           | <b>SpoT<sub>Ab</sub>-ppGpp complex</b>        | <b>Mn<sup>2+</sup>-free SpoT<sub>Ab</sub><sup>NTD</sup></b> |
|---------------------------------------------------------|-----------------------------------------------|-------------------------------------------------------------|
| Diffraction source                                      | Soleil PX1                                    | Soleil PX2                                                  |
| Wavelength (Å)                                          | 0.9786                                        | 0.9801                                                      |
| Temperature (K)                                         | 100.0                                         | 100.0                                                       |
| Detector                                                | Eiger-X 16M                                   | Eiger-X 16M                                                 |
| Crystal-detector distance (mm)                          | 402.12                                        | 254.68                                                      |
| Rotation range per image (°)                            | 0.01                                          | 0.10                                                        |
| Exposure time per image (s)                             | 0.01                                          | 0.004                                                       |
| Space group                                             | P2 <sub>1</sub> 2 <sub>1</sub> 2 <sub>1</sub> | P4 <sub>1</sub> 22                                          |
| <i>a</i> , <i>b</i> , <i>c</i> (Å)                      | 128.8, 133.8, 211.3                           | 90.9, 90.9, 262.4                                           |
| $\alpha$ , $\beta$ , $\gamma$ (°)                       | 90.0, 90.0, 90.0                              | 90.0 90.0 90.0                                              |
| Mosaicity (°)                                           | 0.20                                          | 0.20                                                        |
| Resolution range (Å)                                    | 48.88 – 2.51                                  | 85.90 – 2.79                                                |
| Total N°. of reflections                                | 1158971 (58614)                               | 628934 (33155)                                              |
| N°. of unique reflections                               | 83804 (4191)                                  | 25329 (1230)                                                |
| Completeness (ellipsoidal %)                            | 95.5 (72.6)                                   | 95.6 (86.4)                                                 |
| Redundancy                                              | 13.8 (14.0)                                   | 24.8 (27.0)                                                 |
| $\langle I/\sigma(I) \rangle$                           | 9.5 (1.5)                                     | 10.1 (2.0)                                                  |
| $CC_{1/2}$                                              | 0.995 (0.712)                                 | 0.990 (0.487)                                               |
| $R_{pim}$                                               | 0.051 (0.459)                                 | 0.108 (0.689)                                               |
| Overall <i>B</i> factor / Wilson plot (Å <sup>2</sup> ) | 60.6                                          | 44.3                                                        |
| R-factor (%)                                            | 21.7                                          | 24.6                                                        |
| R <sub>free</sub> -factor (%)                           | 25.0                                          | 28.6                                                        |
| Ramachandran profile (%)                                |                                               |                                                             |
| Core                                                    | 97.0                                          | 96.4                                                        |
| Allowed                                                 | 3.0                                           | 3.6                                                         |
| Outliers                                                | 0.0                                           | 0.0                                                         |
| R.m.s. deviations                                       |                                               |                                                             |
| Bond lengths (Å)                                        | 0.012                                         | 0.014                                                       |
| Bond angles (°)                                         | 1.56                                          | 1.55                                                        |
| Number of atoms                                         | 22600                                         | 5158                                                        |
| Macromolecules                                          | 21520                                         | 4893                                                        |
| Solvent                                                 | 872                                           | 242                                                         |
| Other                                                   | 208                                           | 23                                                          |
| B-factors (Å <sup>2</sup> )                             |                                               |                                                             |
| All atoms                                               | 69.9                                          | 49.4                                                        |
| Macromolecules                                          | 69.8                                          | 49.6                                                        |
| Solvent atoms                                           | 54.5                                          | 39.0                                                        |
| Other atoms                                             | 147.3                                         | 103.3                                                       |
| PDB ID                                                  | 7QPR                                          | 7QPS                                                        |

80



81 **Supplementary Table 2. Average length of the different domains and interdomain regions**  
 82 **of bifunctional Rel, and the monofunctional RelA and SpoT.**  
 83

| RSH  | HD/pseudo-HD | $\alpha 6/ \alpha 7$<br>motif | pseudo-SYNTH<br>/SYNTH | Core | TGS | HEL | HEL/ZFD<br>IDR | ZFD | ZFD/RRM<br>linker | RRM |
|------|--------------|-------------------------------|------------------------|------|-----|-----|----------------|-----|-------------------|-----|
| RelA | 167          | 24                            | 130                    | 56   | 86  | 83  | 33             | 48  | 12                | 76  |
| Rel  | 166          | 11                            | 144                    | 52   | 77  | 87  | 25             | 45  | 12                | 74  |
| SpoT | 165          | 8                             | 138                    | 48   | 73  | 80  | 23             | 46  | 12                | 85  |

84  
 85  
 86  
 87  
 88

89 **Supplementary Table 3. SAXS parameters.**

90 Theoretically and experimentally determined SAXS parameters of the different protein species.  
 91 The quality of the SAXS-based models was assessed based on the metrics proposed by Rambo  
 92 and Tainer.

93

94

| <b>Sample</b>                             | <b><math>R_g</math> (Å)</b> | <b><math>D_{max}</math> (Å)</b> | <b><math>V_P</math> (Å<sup>3</sup>)</b> | <b><math>V_C</math></b> | <b>Conformation</b> |
|-------------------------------------------|-----------------------------|---------------------------------|-----------------------------------------|-------------------------|---------------------|
| SpoT <sub>Ab</sub>                        | 37.0                        | 102.9                           | 1.6                                     | 625                     | τ-state             |
| SpoT <sub>Ab</sub> <sup>L356D</sup>       | 36.3                        | 102.7                           | 1.5                                     | 613                     | τ-state             |
| SpoT <sub>Ab</sub> <sup>L356D</sup>       | 40.6                        | 135.3                           | 1.7                                     | 742                     | relaxed state       |
| SpoT <sub>Ab</sub> <sup>E379K/W382K</sup> | 35.8                        | 103.9                           | 1.4                                     | 607                     | τ-state             |
| SpoT <sub>Ab</sub> <sup>I637D/R614D</sup> | 35.6                        | 103.1                           | 1.3                                     | 583                     | τ-state             |
| RelA <sub>Ab</sub>                        | 42.0                        | 140.0                           | 2.5                                     | 903                     | relaxed state       |
| Rel <sub>Bs</sub>                         | 36.6                        | 101.3                           | 1.3                                     | 520                     | τ-state             |
| Rel <sub>Bs</sub>                         | 41.0                        | 139.4                           | 1.8                                     | 696                     | relaxed state       |

100

101

102

103

104 **Supplementary Table 4. Protein stability parameters as determined by chemical**  
 105 **denaturation assays.**

106 Experimentally determined thermodynamic parameters resulting from the denaturation of the  
 107 different SpoT<sub>Ab</sub> variants as well as RelB<sub>S</sub> and RelA<sub>Ab</sub>.

108  
 109

| <b>Sample</b>                             | <b><i>m</i> (kcal mol<sup>-1</sup> M<sup>-1</sup>)</b> | <b>ΔG<sub>u</sub> (kcal mol<sup>-1</sup>)</b> | <b>Conformation</b>   |
|-------------------------------------------|--------------------------------------------------------|-----------------------------------------------|-----------------------|
| SpoT <sub>Ab</sub>                        | 1.4                                                    | 5.4                                           | τ-state               |
| SpoT <sub>Ab</sub> <sup>L356D</sup>       | 1.0                                                    | 4.0                                           | relaxed state         |
| SpoT <sub>Ab</sub> <sup>A348R</sup>       | 1.3                                                    | 4.8                                           | predominately τ-state |
| SpoT <sub>Ab</sub> <sup>A351K</sup>       | 0.9                                                    | 3.6                                           | relaxed state         |
| SpoT <sub>Ab</sub> <sup>L373G/D374G</sup> | 1.1                                                    | 3.9                                           | relaxed state         |
| SpoT <sub>Ab</sub> <sup>D374G</sup>       | 1.5                                                    | 5.5                                           | τ-state               |
| SpoT <sub>Ab</sub> <sup>Y375G</sup>       | 1.1                                                    | 4.2                                           | relaxed state         |
| SpoT <sub>Ab</sub> <sup>I637D/R614D</sup> | 1.8                                                    | 7.1                                           | τ-state               |
| SpoT <sub>Ab</sub> <sup>H54A/H78A</sup>   | 1.0                                                    | 3.6                                           | relaxed state         |
| RelB <sub>S</sub>                         | 1.5                                                    | 4.6                                           | predominately τ-state |
| RelA <sub>Ab</sub>                        | 0.6                                                    | 2.2                                           | relaxed state         |
